# Supplementary material for: Inflammatory Regulation by Driving Microglial M2 Polarization: Neuroprotective Effects of Cannabinoid Receptor-2 Activation in Intracerebral Hemorrhage
Source: PubMed Central journal article supplement (PMC5306140; doi:10.3389/fimmu.2017.00112), 2017-02-14
Supplement: table_1.pdf [file table_1.pdf]

**Table S1** Forward and reverse sequences of the used primers.

| <b>Gene</b>                    | <b>Forward sequence</b>   | <b>Reverse sequence</b> |
|--------------------------------|---------------------------|-------------------------|
| <b>CD68</b>                    | ATGGTTCCCAGCCATGTGTT      | TTCCACCCTGGGTCAGGTA     |
| <b>CD86</b>                    | GACACCCACGGGATCAATTA      | GCCTCCTCTATTCAGGTTAC    |
| <b>CD32</b>                    | AATCCTGCCGTTCTACTGATC     | CCTTCGGGCCAAAGATCCTG    |
| <b>CD206</b>                   | ACTGCGTGGTGATGAAAGG       | GTGTCACCGTGTCTTCCTGAG   |
| <b>Ym1</b>                     | GATCACCACCCTATGACCCT      | GGGACCAGTTGGTGTAGTAGC   |
| <b>Arg-1</b>                   | TGGCGTTGACCTTGTCTTGT      | TTGCTGTGATGCCCCAGAT     |
| <b>CCL-22</b>                  | CTGATGCAGGTCCCTATGGT      | GCAGGATTTTGAGGTCCAGA    |
| <b>iNOS</b>                    | CAAGCACCTTGAAGAGGAG       | AAGGCCAAACACAGCATAACC   |
| <b>IL-1<math>\beta</math></b>  | GGCAACTGTCCCTGAACT        | TCCACAGCCACAATGAGT      |
| <b>TNF-<math>\alpha</math></b> | GACCCTCACACTCAGATCATCTTCT | TGCTACGACGTGGGCTACG     |
| <b>IL-4</b>                    | CGTGATGTACCTCCGTGCTT      | GTGAGTTCAGACCGCTGACA    |
| <b>IL-10</b>                   | TTGAACCACCCGGCATCTAC      | CCAAGGAGTTGCTCCCGTTA    |
| <b>TGF-<math>\beta</math></b>  | TGGCCAGATCCTGTCCAAAC      | GTTGTACAAAGCGAGCACCG    |
