# Supplementary material for: Inflammatory Regulation by Driving Microglial M2 Polarization: Neuroprotective Effects of Cannabinoid Receptor-2 Activation in Intracerebral Hemorrhage
Source: PubMed Central journal article supplement (PMC5306140; doi:10.3389/fimmu.2017.00112), 2017-02-14
Supplement: table_2.pdf [file table_2.pdf]

**Table S2** siRNA sequences

|           | sense                              | antisense                          |
|-----------|------------------------------------|------------------------------------|
| CREB-1    | 5'-CUGCAGACAUUAACCAUGA [dT][dT]-3' | 5'-UCAUGGUUAAUGUCUGCAG [dT][dT]-3' |
| siRNA     | 5'-CAACCAAGUUGUUGUCAA[dT][dT]-3'   | 5'-UUGAACACAACUUGGUUG [dT][dT]-3'  |
|           | 5'-GCAAGAGAAUGUCGUAGAA[dT][dT]-3'  | 5'-UUCUACGACAUUCUCUUGC [dT][dT]-3' |
| scrambled | 5'-UUCUCCGAACGUGUCACGU[dT][dT]-3'  | 5'-ACGUGACACGUUCGGAGAA [dT][dT]-3' |
| siRNA     |                                    |                                    |
